# Supplementary material for: Lifelong malaria exposure drives B cell activation and post-transcriptional regulation while suppressing inflammatory transcriptional programs
Source: Research Square preprint supplement (doi:10.21203/rs.3.rs-6974016/v1), 2025-07-08
Supplement: Supplementary file 1 [file 46ee2c6e1a5ab7e6650e16f5.xlsx]

## Sheet: GSEA_Pathways
Upregulated Biological Processes in high malaria exposure group
GSEA pathway	pval	padj	NES
IMMUNOGLOBULIN_PRODUCTION	3.15e-11	0	2.287
ANTIGEN_PROCESSING_AND_PRESENTATION_OF_EXOGENOUS_PEPTIDE_ANTIGEN	5.55e-07	0.001	2.22
ANTIGEN_PROCESSING_AND_PRESENTATION_OF_EXOGENOUS_ANTIGEN	2.49e-06	0.003	2.207
ANTIGEN_PROCESSING_AND_PRESENTATION_OF_PEPTIDE_ANTIGEN	9.5e-07	0.001	2.153
ANTIGEN_PROCESSING_AND_PRESENTATION_OF_PEPTIDE_OR_POLYSACCHARIDE_ANTIGEN_VIA_MHC_CLASS_II	1.29e-05	0.008	2.152
ANTIGEN_PROCESSING_AND_PRESENTATION_OF_EXOGENOUS_PEPTIDE_ANTIGEN_VIA_MHC_CLASS_II	2.7e-05	0.013	2.135
PEPTIDE_ANTIGEN_ASSEMBLY_WITH_MHC_PROTEIN_COMPLEX	4.95e-05	0.017	2.077
PRODUCTION_OF_MOLECULAR_MEDIATOR_OF_IMMUNE_RESPONSE	1.15e-09	0	2.057
PEPTIDE_ANTIGEN_ASSEMBLY_WITH_MHC_CLASS_II_PROTEIN_COMPLEX	0.000186	0.039	2.024
ANTIGEN_PROCESSING_AND_PRESENTATION	1.38e-05	0.008	1.979
IMMUNOGLOBULIN_PRODUCTION_INVOLVED_IN_IMMUNOGLOBULIN_MEDIATED_IMMUNE_RESPONSE	2.99e-05	0.013	1.951
EXOCYTIC_PROCESS	2.98e-05	0.013	1.943
ADAPTIVE_IMMUNE_RESPONSE	5.53e-12	0	1.898
ANTIGEN_RECEPTOR_MEDIATED_SIGNALING_PATHWAY	6.47e-07	0.001	1.87
B_CELL_MEDIATED_IMMUNITY	4.25e-06	0.004	1.859
IMMUNE_RESPONSE_REGULATING_CELL_SURFACE_RECEPTOR_SIGNALING_PATHWAY	8.19e-06	0.006	1.717
ACTIVATION_OF_IMMUNE_RESPONSE	5.87e-06	0.005	1.687
REGULATION_OF_SYNAPTIC_VESICLE_MEMBRANE_ORGANIZATION	0.000189	0.039	1.676
ADAPTIVE_IMMUNE_RESPONSE_SOMATIC_RECOMBINATION	3.76e-05	0.014	1.615
LYMPHOCYTE_MEDIATED_IMMUNITY	7.71e-05	0.023	1.603
LEUKOCYTE_MEDIATED_IMMUNITY	0.000229	0.043	1.502
POSITIVE_REGULATION_OF_IMMUNE_RESPONSE	0.00012	0.03	1.501
IMMUNE_RESPONSE	6.95e-08	0	1.481
IMMUNE_EFFECTOR_PROCESS	0.000126	0.031	1.451
REGULATION_OF_CELL_ACTIVATION	0.000258	0.046	1.446
CELL_CELL_ADHESION	0.000126	0.031	1.422
POSITIVE_REGULATION_OF_IMMUNE_SYSTEM_PROCESS	0.000144	0.033	1.402
Downregulated Biological processes in high malaria exposure group
GSEA pathway	pval	padj	NES
CD4_POSITIVE_ALPHA_BETA_T_CELL_CYTOKINE_PRODUCTION	1.16e-06	0.001	-2.234
POSITIVE_REGULATION_OF_T_HELPER_1_TYPE_IMMUNE_RESPONSE	5.28e-06	0.005	-2.215
INTERLEUKIN_1_MEDIATED_SIGNALING_PATHWAY	3.13e-05	0.013	-2.076
ACUTE_PHASE_RESPONSE	3.31e-05	0.014	-2.074
CELLULAR_RESPONSE_TO_INTERLEUKIN_1	1.63e-05	0.008	-2.048
T_HELPER_1_CELL_CYTOKINE_PRODUCTION	0.000114	0.029	-1.98
ACUTE_INFLAMMATORY_RESPONSE	4.08e-05	0.015	-1.92
NATURAL_KILLER_CELL_ACTIVATION	0.000287	0.049	-1.837
GRANULOCYTE_MIGRATION	0.000232	0.043	-1.756
TEMPERATURE_HOMEOSTASIS	0.000102	0.027	-1.735
MYELOID_LEUKOCYTE_MIGRATION	0.000206	0.041	-1.703
EXTERNAL_ENCAPSULATING_STRUCTURE_ORGANIZATION	0.000192	0.039	-1.656
INFLAMMATORY_RESPONSE	1.1e-06	0.001	-1.597
BLOOD_VESSEL_MORPHOGENESIS	4.91e-05	0.017	-1.506
TUBE_MORPHOGENESIS	1.56e-05	0.008	-1.499
CIRCULATORY_SYSTEM_DEVELOPMENT	7.14e-06	0.005	-1.482
TUBE_DEVELOPMENT	1.35e-05	0.008	-1.477
ANATOMICAL_STRUCTURE_FORMATION_INVOLVED_IN_MORPHOGENESIS	1.13e-05	0.007	-1.473
VASCULATURE_DEVELOPMENT	0.0001	0.027	-1.471
CELLULAR_RESPONSE_TO_LIPID	0.000282	0.048	-1.448
TISSUE_DEVELOPMENT	8.58e-06	0.006	-1.373
REGULATION_OF_CELL_POPULATION_PROLIFERATION	4.15e-05	0.015	-1.339

## Sheet: Differentially expressed genes
Upregulated Genes				Downregulated Genes
symbol	logFC	PValue	FDR	symbol	logFC	P-Value	FDR
MYRF	2.25546	1.62297e-14	2.51852e-10	C16orf54	-0.570556	1.6418e-12	8.49249e-09
ITGAD	2.65173	9.32342e-14	7.23404e-10	LRG1	-1.06667	9.9076e-10	2.56244e-06
SOX5	1.54281	9.41802e-12	3.65372e-08	ATP8B4	-0.627944	1.6156e-09	3.13387e-06
PARP1	0.444937	1.21261e-10	3.76346e-07	IL18RAP	-0.991793	1.56871e-09	3.13387e-06
PCDH9	1.1441	2.38227e-09	4.10757e-06	CD300LB	-0.766986	1.60965e-07	9.25131e-05
PKIG	0.787679	5.40322e-09	8.38472e-06	PTGS2	-1.06624	1.97015e-07	0.000101909
BANK1	0.644788	6.28991e-09	8.87335e-06	HASPIN	-1.35298	1.92295e-07	0.000101909
ARMCX3	0.468084	1.27291e-08	1.64609e-05	ITGAM	-0.684885	2.23282e-07	0.000111771
TSPAN33	0.902267	3.49182e-08	4.16816e-05	NIPAL4	-1.01623	2.98276e-07	0.000140262
PDLIM1	0.70846	3.92766e-08	4.35353e-05	PTPRE	-0.493549	3.81777e-07	0.000164567
WNT16	1.31454	7.10784e-08	5.40089e-05	OSM	-0.94834	4.65872e-07	0.000195389
AARS1	0.62718	7.30885e-08	5.40089e-05	CITED2	-0.372566	1.43449e-06	0.000454293
BTN3A3	0.500839	7.24124e-08	5.40089e-05	ALDH2	-0.760882	2.00858e-06	0.000556592
GPR55	1.21832	6.47759e-08	5.40089e-05	AHR	-0.572706	2.24871e-06	0.000581592
SUSD5	1.48182	6.82642e-08	5.40089e-05	CBX8	-0.916243	3.74744e-06	0.000850577
CXCR2P1	1.25373	6.20876e-08	5.40089e-05	IL18R1	-0.600677	4.3606e-06	0.000953066
SNX1	0.522194	9.7547e-08	6.88061e-05	RBPJ	-0.330027	7.26682e-06	0.0014645
CLCN3	0.428213	1.10364e-07	7.44622e-05	GTF2IP4	-0.497069	7.53812e-06	0.00148936
MPHOSPH8	0.450131	1.22399e-07	7.91414e-05	CD93	-0.582762	9.97003e-06	0.00186404
CNDP2	0.540455	1.44012e-07	8.72913e-05	IL23A	-0.558035	1.28247e-05	0.00221127
ARHGAP25	0.431751	1.46254e-07	8.72913e-05	GADD45B	-0.622811	1.54967e-05	0.0025198
KIF3B	0.361224	1.95455e-07	0.000101909	CRTAP	-0.368916	1.5853e-05	0.00253616
POU3F3	1.71427	2.53203e-07	0.000122788	CCR1	-0.674706	1.83605e-05	0.00270101
P2RX5	0.604776	3.41706e-07	0.000151503	MATCAP2	-0.688532	1.85663e-05	0.00270101
CD72	0.695421	3.34272e-07	0.000151503	FPR1	-0.62847	1.85631e-05	0.00270101
SPARC	1.13866	4.93796e-07	0.000201651	SERTAD1	-0.508194	1.8474e-05	0.00270101
CHMP2A	0.567213	5.11452e-07	0.000203505	PPIF	-0.556728	2.47289e-05	0.0033369
NUTF2	0.753352	5.58962e-07	0.000206523	SESN2	-0.732925	2.66237e-05	0.00347182
UBE2L6	0.708667	5.46531e-07	0.000206523	PHLDA1	-0.606677	2.79208e-05	0.00349415
SAFB	0.509531	5.47897e-07	0.000206523	LSM12	-0.355264	2.77849e-05	0.00349415
FAM3C	0.411514	6.20433e-07	0.000223904	YIF1B	-0.460677	2.72944e-05	0.00349415
YARS1	0.406902	7.34943e-07	0.000259201	KLRF1	-0.790452	2.83999e-05	0.00352568
ZBTB32	0.902437	8.08085e-07	0.000278664	RPL7AP43	-0.615856	3.04858e-05	0.00373937
SIGLEC6	0.84405	8.31931e-07	0.00028065	CFAP20	-0.419121	3.16574e-05	0.00381106
TMEM179B	0.580371	1.09992e-06	0.000363162	RASD1	-0.747349	3.18862e-05	0.00381106
NUDT9	0.54906	1.38189e-06	0.000446752	MCTP2	-0.362171	3.70241e-05	0.00413338
PANX1	0.588327	1.47031e-06	0.000456327	ID1	-0.576633	3.75912e-05	0.00415255
LSM10	0.596777	1.5409e-06	0.000468855	MGAM	-0.907005	3.97501e-05	0.00434396
RABEP1	0.268099	1.84248e-06	0.000546678	LATS2	-0.462901	4.37053e-05	0.00461374
TARDBP	0.316648	1.90235e-06	0.000546678	HMCN2	-0.634937	4.88117e-05	0.00485551
HCLS1	0.440056	1.90097e-06	0.000546678	IL1B	-0.736224	5.33184e-05	0.00527003
USP5	0.328078	1.99519e-06	0.000556592	CACNA2D3	-0.699366	5.87439e-05	0.00559256
TAS1R3	0.914255	2.04807e-06	0.000557577	CYP1B1	-0.858475	6.05483e-05	0.00569447
CBX1	0.360314	2.19733e-06	0.000581592	CAPG	-0.616805	6.78183e-05	0.00624769
MRPL37	0.521934	2.22383e-06	0.000581592	NIBAN2	-0.497734	7.41891e-05	0.00657867
SMC6	0.354673	2.57322e-06	0.000644053	MID1IP1	-0.494759	7.65838e-05	0.00667656
GP1BB	1.21236	2.55604e-06	0.000644053	EREG	-0.858987	7.79281e-05	0.00674823
STX7	0.548001	2.7862e-06	0.000675567	ITGB8	-0.578804	8.28085e-05	0.00698381
GABARAPL2	0.337433	3.34861e-06	0.000795236	COL9A1	-0.656496	8.79143e-05	0.00724982
CLEC2L	1.49869	3.38224e-06	0.000795236	TPT1	-0.50351	8.84849e-05	0.00724982
CDK14	0.670388	3.75026e-06	0.000850577	ABCG1	-0.469598	9.26392e-05	0.00744858
ACTG1	0.504599	3.78205e-06	0.000850577	SNX30	-0.256912	9.44925e-05	0.00751966
KMT5B	0.273975	4.23721e-06	0.000939329	SAPCD2	-0.578165	9.43505e-05	0.00751966
CNOT11	0.417875	4.72066e-06	0.00101743	LSP1	-0.579472	9.95007e-05	0.00779824
MAN2B2	0.372264	4.86679e-06	0.00103456	LIG1	-0.616114	0.000103763	0.00805099
NRDC	0.322406	6.28023e-06	0.00129942	ELMO3	-0.717214	0.000109065	0.00828043
NUDT21	0.38039	6.25698e-06	0.00129942	IVNS1ABP	-0.439079	0.00011021	0.00828043
IFI16	0.510984	6.51977e-06	0.00133123	SYTL2	-0.372447	0.000115038	0.00848965
VAMP8	0.591526	7.58215e-06	0.00148936	CXCL8	-0.758219	0.000114701	0.00848965
SSPN	0.82996	9.31141e-06	0.00178388	CSNK1A1	-0.322706	0.000120584	0.00874401
BANF1	0.749723	9.63599e-06	0.00182355	ADAM8	-0.364824	0.000123686	0.00888591
SCGB3A2	0.880152	1.09059e-05	0.00199202	RFX2	-0.897171	0.000130939	0.00930391
NSDHL	0.481449	1.09113e-05	0.00199202	FUT4	-0.300379	0.000131902	0.00930391
PSMC5	0.408861	1.13321e-05	0.00204479	ZSWIM6	-0.26866	0.000133339	0.0093627
RPS10P7	0.625342	1.15984e-05	0.00206878	ABHD1	-0.654285	0.000135776	0.00944038
STMP1	0.37796	1.25556e-05	0.0021892	SLC22A4	-0.591352	0.000138664	0.00956347
ACSS1	0.291718	1.32366e-05	0.00225721	THAP9	-0.365798	0.000144042	0.00978027
SLC35C2	0.462295	1.35401e-05	0.00226276	AMZ1	-0.830716	0.000146219	0.00978027
TIMELESS	0.475754	1.3571e-05	0.00226276	YJU2B	-0.336578	0.000153337	0.0100295
NXPE3	0.406635	1.37066e-05	0.00226276	CXCL1	-0.794649	0.000153823	0.0100295
MGAT3	0.782748	1.55884e-05	0.0025198	SERPINB10	-0.968732	0.000159715	0.0103269
RAP1B	0.353471	1.63013e-05	0.00258126	CNPPD1	-0.369428	0.000160483	0.0103335
ARF1	0.410013	1.68101e-05	0.00263493	BCL2L15	-0.472775	0.000164284	0.0105346
SYT1	1.082	1.69855e-05	0.00263581	C1orf52	-0.288714	0.000173381	0.0108928
PPP1R7	0.431217	1.8624e-05	0.00270101	MEX3B	-0.675627	0.000173035	0.0108928
FCRL5	0.932252	1.76676e-05	0.00270101	CTSH	-0.444382	0.000176041	0.0110153
C2orf88	0.932247	1.80104e-05	0.00270101	URM1	-0.502472	0.000183785	0.0112726
RPL28	0.592481	2.10804e-05	0.00302894	POLR3C	-0.21313	0.000186505	0.0113498
YEATS2	0.295997	2.14599e-05	0.00305517	POLE3	-0.285579	0.000188692	0.0113935
ANXA4	0.4976	2.21022e-05	0.00308992	ADAMTS1	-0.917821	0.000203455	0.0119592
AATF	0.301008	2.19112e-05	0.00308992	MARVELD1	-0.736504	0.000218724	0.0127122
RUFY1	0.506871	2.26635e-05	0.00314011	ARRDC3	-0.310762	0.000223335	0.0128837
MT2A	0.736622	2.35205e-05	0.00323001	TPK1	-0.308351	0.000222789	0.0128837
UBA7	0.247486	2.43249e-05	0.00331117	PLK2	-0.478681	0.00022714	0.0129255
NUDC	0.403333	2.59871e-05	0.00341752	DHRS3	-0.378741	0.000226458	0.0129255
LAMTOR5	0.414265	2.59485e-05	0.00341752	AP2M1	-0.379126	0.000238772	0.013369
UBXN1	0.372637	2.57493e-05	0.00341752	SERPINB2	-1.32484	0.000245495	0.0136057
YWHAH	0.446715	2.76146e-05	0.00349415	AIP	-0.450877	0.000273073	0.014765
ACTR2	0.444504	2.76996e-05	0.00349415	VIRMA	-0.288881	0.000290054	0.0152556
ESF1	0.369444	3.06032e-05	0.00373937	ENHO	-0.659963	0.00028831	0.0152556
RALB	0.343454	3.20413e-05	0.00381106	ZNF697	-0.62309	0.000298385	0.015538
CD19	0.652462	3.21722e-05	0.00381106	GPR65	-0.356509	0.000302498	0.0156472
AIDA	0.357111	3.3441e-05	0.00393134	FAT4	-0.651735	0.000304051	0.0156753
SRP14	0.394739	3.37235e-05	0.00393474	HSPBAP1	-0.320479	0.000306696	0.0157593
PNN	0.40031	3.43008e-05	0.00393613	ZNF823	-0.414609	0.000322423	0.0162447
DYNLRB1	0.504019	3.45678e-05	0.00393613	CSF2RA	-0.369799	0.000324348	0.0162888
ARPC5L	0.332261	3.47499e-05	0.00393613	MAFB	-0.567643	0.000352103	0.0172364
NDUFB10	0.320772	3.44639e-05	0.00393613	CYP2R1	-0.328043	0.000356693	0.0174062
GLE1	0.267577	3.7731e-05	0.00415255	G0S2	-0.679981	0.000362278	0.0175682
TBCB	0.406101	4.22127e-05	0.00454918	SOCS6	-0.522985	0.000369854	0.017769
WBP1L	0.316192	4.22143e-05	0.00454918	MAPK8	-0.286951	0.00038249	0.0181513
FUNDC2	0.326055	4.26652e-05	0.00456606	FSBP	-0.379587	0.000387923	0.0182418
PIK3AP1	0.383053	4.35288e-05	0.00461374	CCDC69	-0.30538	0.000399459	0.0187275
ERICH1	0.5407	4.4855e-05	0.0046404	BST1	-0.572115	0.000429002	0.0193912
SCAMP2	0.538057	4.46909e-05	0.0046404	IQSEC2	-0.591821	0.000431832	0.0193912
NDUFS6	0.386966	4.45395e-05	0.0046404	IMP3	-0.385291	0.000429927	0.0193912
OXCT1	0.27446	4.53768e-05	0.00466329	IL23R	-0.515467	0.000449124	0.0199699
YWHAB	0.256576	4.61376e-05	0.00471028	ZNF511	-0.400078	0.000450936	0.0199932
ASCC2	0.360472	4.64636e-05	0.00471257	SSTR5	-1.00696	0.00045261	0.0200103
HSP90AA1	0.419205	4.71358e-05	0.00471906	ARF5	-0.392812	0.000454975	0.0200577
CXCR2	0.762148	4.68546e-05	0.00471906	TLE4	-0.228106	0.000461515	0.0201206
KRTCAP2	0.423471	5.40613e-05	0.00527625	COQ8A	-0.294009	0.000461723	0.0201206
FCRL6	0.704825	5.40305e-05	0.00527625	MAFF	-0.448041	0.000462885	0.0201206
TGFB2	0.910712	5.44074e-05	0.00527684	PHF5A	-0.350953	0.000468743	0.0202617
NCK1	0.313894	5.47533e-05	0.0052774	DNAAF1	-0.624253	0.000473853	0.0204257
PRUNE1	0.420402	5.84751e-05	0.00559256	VAV3	-0.297001	0.000480928	0.0206161
FAM120B	0.37659	5.98001e-05	0.0056584	PID1	-0.528557	0.000479989	0.0206161
ABLIM3	0.951726	6.30979e-05	0.00589851	MYH10	-0.6803	0.000487915	0.020858
PALM2AKAP2	0.485289	6.6814e-05	0.0062085	LGALS3	-0.522706	0.000494492	0.0209327
RBM15	0.387922	6.8041e-05	0.00624769	CSRP1	-0.40715	0.000492907	0.0209327
CETP	0.776018	6.89929e-05	0.0062768	H3C6	-0.607028	0.000495057	0.0209327
DDRGK1	0.378233	6.9167e-05	0.0062768	ZKSCAN5	-0.224501	0.000507276	0.0213331
RGS13	1.23288	7.28331e-05	0.00654555	CSTA	-0.446224	0.000514658	0.021469
APEX1	0.538248	7.29721e-05	0.00654555	B4GALNT2	-0.35774	0.000512155	0.021469
CUL1	0.230114	7.35749e-05	0.0065617	S100A12	-0.551335	0.000516835	0.021502
C22orf46P	0.64041	7.49596e-05	0.00660922	LRMDA	-0.608952	0.000523557	0.0217234
EHD3	0.487209	7.64794e-05	0.00667656	HTATSF1P2	-0.67275	0.000532187	0.0219553
ATP5MC2	0.432455	7.82756e-05	0.00674823	H2AC25	-0.450999	0.00053339	0.0219553
SSU72	0.32393	7.89881e-05	0.00677203	CXCL3	-0.891918	0.000551977	0.0226005
PXDNL	0.780533	8.1264e-05	0.00692887	TRAPPC14	-0.294891	0.000574909	0.0233425
HNRNPM	0.382299	8.27127e-05	0.00698381	DHX32	-0.359704	0.000586211	0.023506
ZNF580	0.549061	8.42354e-05	0.00706576	SGK1	-0.484044	0.00058607	0.023506
ZNF207	0.269165	8.97e-05	0.00724982	PROK2	-0.697944	0.000589611	0.023567
RANGRF	0.424698	8.93139e-05	0.00724982	PRKRA	-0.177987	0.000598364	0.023567
FRMD3	0.763142	8.91548e-05	0.00724982	MEX3D	-0.504219	0.000596927	0.023567
YIF1A	0.403117	8.8053e-05	0.00724982	CSF3R	-0.450086	0.00062805	0.0243044
CSTF3	0.415467	8.71316e-05	0.00724982	ANO5	-0.723662	0.000630467	0.0243373
RPL8	0.332022	9.94851e-05	0.00779824	AFF2	-0.464419	0.000633984	0.0244123
EIF4ENIF1	0.427482	9.91184e-05	0.00779824	RNF2	-0.250941	0.000669457	0.0253381
FCRLB	0.736929	0.000101434	0.00790984	WDR25	-0.411558	0.000689737	0.0257875
ZNHIT6	0.289105	0.000106832	0.00824785	LAMB3	-0.641939	0.0006913	0.0257875
COX17	0.360606	0.000109623	0.00828043	PPP1R12C	-0.275482	0.000693855	0.0258207
AHCYL1	0.287279	0.000108576	0.00828043	CALR	-0.38084	0.00069579	0.0258308
SHISA8	0.830048	0.000108564	0.00828043	CTNNB1	-0.270968	0.00071205	0.026235
IGKV1-8	0.926959	0.000110456	0.00828043	CTSW	-0.590222	0.000729314	0.0265047
NUAK1	0.984675	0.000115055	0.00848965	THBS1	-1.01021	0.000734941	0.026566
YPEL2	0.254167	0.000115435	0.00848965	S100A9	-0.546572	0.000735995	0.026566
TTC13	0.265737	0.000116176	0.00850386	SHOX	-0.885598	0.000756627	0.0269477
COX20	0.272785	0.000118467	0.00863084	CEP170	-0.353257	0.000804294	0.028366
TRA2A	0.313258	0.00013189	0.00930391	ARK2C	-0.61177	0.00081119	0.0285265
PPP1CA	0.42256	0.000130944	0.00930391	PLCB1	-0.43787	0.000812714	0.0285265
RPS16	1.01098	0.000134968	0.00943436	WARS2	-0.371855	0.000830398	0.028627
STX4	0.296861	0.00013627	0.00944038	SLC19A2	-0.371149	0.000828102	0.028627
KCNN4	0.457191	0.00014409	0.00978027	CLIC3	-0.773521	0.000830941	0.028627
MS4A1	0.529697	0.000145237	0.00978027	LEKR1	-0.52036	0.00083289	0.028627
GFI1B	0.731181	0.00014575	0.00978027	SPRY1	-0.561103	0.000837768	0.0286668
HDHD2	0.435457	0.000144739	0.00978027	KTI12	-0.319395	0.00084605	0.0287917
SMG1P4	2.40503	0.000144535	0.00978027	RNF19B	-0.446887	0.000853862	0.0289939
DYNLL2	0.404068	0.000148876	0.00991527	IL10RA	-0.2768	0.000872375	0.0295579
HPF1	0.394714	0.00015357	0.0100295	TMEM86A	-0.488286	0.00087798	0.0295606
CHFR	0.202138	0.000151833	0.0100295	TGFBI	-0.372921	0.000883604	0.0296151
TREML1	0.866788	0.000152926	0.0100295	CD1D	-0.373561	0.00090743	0.0300734
PRSS57	1.13811	0.000159107	0.0103269	ZNF180	-0.290241	0.000951238	0.0308169
ZCRB1	0.362925	0.000167554	0.0107	TMEM8B	-0.526988	0.000960318	0.0309514
TTC1	0.320788	0.000169202	0.010761	MBNL2	-0.219123	0.000968132	0.0309514
RPL12	0.265173	0.000172425	0.0108928	SLC4A10	-0.64371	0.000959698	0.0309514
HPRT1	0.339524	0.000179526	0.0111883	PPP1R35	-0.418096	0.000966759	0.0309514
DENR	0.210566	0.000180297	0.0111914	ANXA2R	-0.285276	0.000969351	0.0309514
SNCA	0.836807	0.0001823	0.0112275	CHP1	-0.367863	0.000966731	0.0309514
MARF1	0.54793	0.000182326	0.0112275	TRABD	-0.337346	0.000980594	0.0311183
BCL2L1	0.385	0.000185306	0.0113212	CHRNA7	-0.749777	0.000990949	0.0311803
FAXDC2	0.635497	0.000187741	0.0113803	TOGARAM1	-0.234276	0.000994337	0.0311803
GEN1	0.45339	0.000192767	0.0115944	F5	-0.511673	0.00101528	0.0315733
ZC3H8	0.377759	0.000194402	0.0116476	APBB3	-0.310689	0.00103615	0.0319487
EIF3K	0.411977	0.000197534	0.0117898	ARRDC4	-0.4515	0.00103711	0.0319487
SEPHS2	0.364671	0.00019885	0.0118228	NRBF2	-0.392793	0.0010397	0.0319487
SYTL4	0.762796	0.000201065	0.0119089	CAMSAP1	-0.361951	0.00104366	0.0319523
MAP3K7CL	0.78206	0.000202811	0.0119592	QTRT2	-0.205612	0.00104666	0.0319523
CHSY3	1.37487	0.000208029	0.0121819	CIDEB	-0.364526	0.00104805	0.0319523
NBR1	0.258878	0.000216721	0.0126431	WNT11	-0.805334	0.00106709	0.0324689
HNRNPH3	0.615299	0.000227391	0.0129255	RGS17	-0.376873	0.00109008	0.0331033
PARP9	0.50135	0.000226635	0.0129255	ZNF503	-0.549834	0.00113707	0.0341959
TRAC	0.466211	0.000230853	0.0130744	CNTF	-0.40581	0.00115538	0.0346794
NAT8B	0.86304	0.000232847	0.0131394	RNF130	-0.356297	0.00116774	0.0349826
C10orf143	0.450516	0.000238165	0.013369	TBC1D10A	-0.411759	0.00117548	0.0350419
PQBP1	0.463403	0.000239502	0.013369	B3GNT5	-0.63524	0.00118112	0.0351123
ENKUR	0.80344	0.000244746	0.0136057	AGTPBP1	-0.206377	0.00119676	0.0352732
STOM	0.362028	0.000253342	0.0139906	ALDH1A2	-0.842009	0.00122309	0.0356765
NFE2L1	0.390383	0.000268914	0.0147115	COA1	-0.190453	0.00122837	0.0356965
ARHGDIB	0.235582	0.00026924	0.0147115	RAB44	-0.510954	0.0012347	0.0358132
TRIR	0.437491	0.000267723	0.0147115	FCGBP	-0.66775	0.0012381	0.0358449
HNRNPA2B1	0.357206	0.00027159	0.0147605	RASSF2	-0.314397	0.00124476	0.0359706
TAF8	0.210215	0.000272039	0.0147605	TRAF7	-0.398481	0.00127185	0.0366169
TUBA4A	0.45325	0.000281883	0.0151358	OAZ3	-0.558688	0.00127558	0.0366565
RAB24	0.370057	0.000281827	0.0151358	MTHFD2L	-0.254478	0.0012858	0.036746
CCDC12	0.357327	0.000284393	0.015218	MAP3K3	-0.286895	0.00128431	0.036746
CTSA	0.40035	0.000290995	0.0152556	PHLDB2	-0.412774	0.00132245	0.0375617
MORC1	0.924017	0.000290295	0.0152556	UBXN11	-0.397843	0.0013298	0.0375617
PDCD11	0.30159	0.00028788	0.0152556	OPLAH	-0.538464	0.00133129	0.0375617
AARSD1	0.296762	0.000289726	0.0152556	PRXL2C	-0.322116	0.00133896	0.0377095
DDX11L2	0.867993	0.000296348	0.015484	ADAM15	-0.343752	0.00135939	0.0380775
TPM3	0.259059	0.000300782	0.0156105	ID2	-0.265915	0.00136883	0.0380994
ZNF236	0.312248	0.000312008	0.0159793	DGKZ	-0.287627	0.00136999	0.0380994
TAGLN2	0.388902	0.000314434	0.0160444	USP38	-0.218957	0.00136592	0.0380994
GRAMD1C	0.697576	0.000315346	0.0160444	RPL6P10	-0.523878	0.00143973	0.0396832
MYL12A	0.290245	0.000320837	0.0162174	ZNF627	-0.282922	0.0014458	0.0397799
FCRL3	0.500502	0.000319898	0.0162174	VCAN	-0.445666	0.00145528	0.0398289
TEP1	0.349465	0.000326046	0.0163212	MRPL47	-0.283213	0.00145139	0.0398289
ROCK2	0.296407	0.000328548	0.0163936	ZNF714	-0.40318	0.00147614	0.0402579
PDAP1	0.349712	0.000334052	0.016568	RGCC	-0.564213	0.00148573	0.0404276
DCPS	0.510646	0.000335238	0.016568	TUBA1A	-0.313809	0.00150078	0.0404276
DBNL	0.26101	0.000335245	0.016568	ZBTB41	-0.241521	0.00149426	0.0404276
CLK3	0.283268	0.000338141	0.016658	DIPK2A	-0.307043	0.00150321	0.0404276
ESAM	0.706976	0.000351003	0.0172364	NCR1	-0.571592	0.00149318	0.0404276
SLC44A2	0.444512	0.00036163	0.0175682	MATN2	-0.502644	0.00151116	0.0405713
SUPT20HL2	0.718706	0.000369634	0.017769	IFT20	-0.15304	0.00151807	0.0406417
PISD	0.308309	0.000368262	0.017769	TGFA	-0.487941	0.00152164	0.0406417
PNISR	0.264056	0.000371943	0.0178143	ZMAT4	-0.970398	0.00152498	0.0406463
MACF1	0.231739	0.0003754	0.0179245	UBE2A	-0.19401	0.00153853	0.0408677
FTSJ3	0.293369	0.000382311	0.0181513	MCRS1	-0.239934	0.00154679	0.0409609
GUCY1B1	0.651592	0.000385246	0.018171	FADS3	-0.489656	0.0015568	0.0411556
BLNK	0.567152	0.000384561	0.018171	GABRD	-0.456699	0.00158363	0.0415684
DDX1	0.233548	0.000400864	0.0187368	LYRM4	-0.264403	0.00158173	0.0415684
CCDC191	0.362357	0.000403243	0.0187913	COG5	-0.573058	0.00159502	0.0416692
RAP1A	0.304354	0.000408478	0.0188521	NR3C1	-0.237007	0.00160886	0.04196
SERINC3	0.254004	0.000406314	0.0188521	DNAJC5	-0.198494	0.00161311	0.0420005
NBPF20	0.371604	0.000408802	0.0188521	LIPN	-0.46782	0.00162588	0.0420507
HARS1	0.191872	0.000409406	0.0188521	POGLUT2P1	-0.405042	0.00164603	0.04236
CASP5	0.840965	0.000414067	0.0190103	ZNF804A	-0.375523	0.00165138	0.0424274
GBP1	0.648413	0.000417055	0.0190911	ACTR1B	-0.275342	0.0016734	0.042811
DDX5	0.22267	0.000422684	0.0192352	PNPO	-0.312353	0.00170317	0.0430452
FXN	0.376978	0.000421841	0.0192352	RPL10	-0.263403	0.00170044	0.0430452
ACER2	0.554687	0.000432359	0.0193912	STAT4	-0.264349	0.00172736	0.0433741
JPT2	0.384741	0.000439429	0.0196515	ADO	-0.296891	0.00173775	0.0434317
KIAA0040	0.313702	0.000447102	0.0199372	RASSF4	-0.348244	0.00175703	0.0437649
UBASH3B	0.341543	0.000460388	0.0201206	VILL	-0.367325	0.00177965	0.0440456
CAVIN2	0.752004	0.000459265	0.0201206	BTN2A1	-0.349479	0.00179255	0.0442566
BTF3	0.291035	0.000467786	0.0202617	MOCOS	-0.336129	0.00180881	0.0444835
PEF1	0.298139	0.000493872	0.0209327	SLC25A6	-0.247905	0.00180757	0.0444835
GGA2	0.348103	0.00049959	0.0210669	SOX4	-0.324496	0.00183348	0.0448062
CD180	0.390644	0.000514207	0.021469	FBN2	-0.494191	0.00182886	0.0448062
ADD3	0.196424	0.000528943	0.0218884	BAZ2B	-0.176385	0.00184422	0.0449272
KIDINS220	0.17854	0.000541523	0.0222311	DOK3	-0.388521	0.00184994	0.0449959
PPP1R14A	0.716247	0.000556804	0.0227381	ZNF555	-0.335066	0.00188826	0.0456419
TFCP2	0.316359	0.000576116	0.0233425	PIWIL2	-0.640624	0.00199024	0.0474416
PPCS	0.232347	0.00058551	0.023506	STEAP4	-0.39716	0.0019983	0.0475361
RNF220	0.218353	0.000585183	0.023506	PNPLA8	-0.295831	0.00200033	0.0475361
TUBA1B	0.432454	0.0005942	0.023567	IREB2	-0.248984	0.00200983	0.0476536
STON2	0.574114	0.000598228	0.023567	GNG2	-0.327564	0.00201141	0.0476536
EWSR1	0.24745	0.000598134	0.023567	GPNMB	-0.584692	0.00201459	0.0476562
ITGB3	0.929102	0.000592081	0.023567	UBXN10	-0.464659	0.00202179	0.0477537
CTLA4	0.433133	0.000605653	0.0237675	SGK3	-0.258743	0.00202888	0.04781
STIP1	0.317041	0.000606516	0.0237675	TRPS1	-0.200614	0.0020365	0.04781
IKZF3	0.292302	0.00060981	0.0238363	ADRM1	-0.348279	0.00203355	0.04781
CCDC14	0.238731	0.000612436	0.0238788	FTSJ1	-0.226599	0.00207023	0.0483622
SCFD2	0.307203	0.000615692	0.0239456	NLRP3	-0.574738	0.00207249	0.0483622
ARMH3	0.266679	0.000626366	0.0242999	TMEM71	-0.24291	0.00211284	0.0490825
SPCS2	0.454482	0.000640465	0.0245552	DGAT2	-0.407278	0.00213006	0.0493347
MON1B	0.288425	0.000649083	0.024809	TMEM170B	-0.403732	0.00212759	0.0493347
PRPF38A	0.227092	0.000658033	0.0250893	PGBD4	-0.282473	0.00213894	0.049393
FAM24B	0.443545	0.000661617	0.0251642	HMGCR	-0.316577	0.00214537	0.0494678
MAP2K1	0.229132	0.000684256	0.0256706	QPCT	-0.49831	0.0021603	0.0497382
ADA	0.322153	0.000682328	0.0256706	WASL	-0.320859	0.0021682	0.0498461
RAB11FIP3	0.612417	0.000684639	0.0256706	MCRIP2	-0.330087	0.00217158	0.0498499
POF1B	0.750193	0.000698004	0.0258511
GOLGA7	0.350915	0.000704055	0.0260132
KIF1A	0.782669	0.000713441	0.026235
TCAF1	0.344713	0.000717881	0.0262738
PSMB9	0.662959	0.000716832	0.0262738
GPRASP1	0.402739	0.000725146	0.0264772
TRIM69	0.567567	0.000727472	0.0264998
BLK	0.631873	0.000736138	0.026566
UBL7	0.311424	0.000738633	0.0265942
PCSK6	0.590641	0.000750317	0.0268282
UPF2	0.199125	0.000749298	0.0268282
SELP	0.774325	0.000748843	0.0268282
STMN1	0.606781	0.000757133	0.0269477
REXO4	0.266537	0.000771975	0.0274131
EGF	0.869912	0.000782799	0.027734
TFEC	0.399004	0.000789647	0.0279128
IL1RL1	0.924316	0.00081436	0.0285265
ACRBP	0.661674	0.000817106	0.0285582
ZNF37A	0.245855	0.000832512	0.028627
FAM217B	0.343945	0.000833833	0.028627
SYNRG	0.373335	0.000831589	0.028627
HIF1AN	0.267142	0.000839453	0.0286668
UBE2CP5	0.496743	0.000840533	0.0286668
DNMT1	0.339717	0.00087817	0.0295606
CWC22	0.24023	0.000876753	0.0295606
UPF3B	0.400136	0.000881175	0.0295976
ARPC5	0.34747	0.000885691	0.029621
MYO3B	0.890079	0.000891516	0.0297517
MTMR2	0.261049	0.00089538	0.0298165
RAB13	0.555384	0.000899841	0.0299009
FIBP	0.312127	0.000908909	0.0300734
PLPP3	0.762259	0.000915613	0.0301766
BAZ1B	0.153371	0.000928781	0.0304711
MYOM1	0.644511	0.00093197	0.0305112
ACAA1	0.293438	0.000943077	0.0306745
ZCWPW1	0.321942	0.000944864	0.0306745
UBE2I	0.285416	0.000943565	0.0306745
BEX3	0.482923	0.000938978	0.0306745
TBC1D22A	0.247598	0.000965834	0.0309514
GCNT2	0.418011	0.000972426	0.0309858
NOP14	0.204312	0.000980371	0.0311183
PSMB2	0.324765	0.000983089	0.0311338
ARHGAP6	0.559605	0.000994604	0.0311803
DKC1	0.231966	0.000989747	0.0311803
NCF1	0.551845	0.000994323	0.0311803
GTF2A2	0.326322	0.000997651	0.0312128
JRKL	0.28342	0.00100405	0.0313498
GOLM1	0.497197	0.00100937	0.0314525
CLU	0.789599	0.00101735	0.0315743
MRPL18	0.284165	0.00103746	0.0319487
ATP5MC3	0.337148	0.00104649	0.0319523
TCHP	0.241475	0.0010991	0.0333121
ALAD	0.212393	0.00111233	0.0336474
ING5	0.255817	0.00112442	0.0339471
PEA15	0.335737	0.00113454	0.034186
CD40	0.358151	0.00117649	0.0350419
PITPNA	0.458202	0.00117456	0.0350419
SAMD4A	0.509673	0.00118651	0.0351378
NCL	0.334058	0.00118489	0.0351378
ANAPC15	0.293352	0.0011979	0.0352732
TRAPPC3L	0.718433	0.0011956	0.0352732
SP140	0.20023	0.00120785	0.035499
TRIM21	0.294315	0.00121122	0.0355307
SEC14L5	0.838943	0.00122211	0.0356765
CD53	0.326164	0.00122624	0.0356965
KXD1	0.286039	0.00124753	0.0359837
PMPCA	0.284825	0.00128152	0.036746
ZNF185	0.417057	0.00129345	0.0368965
GTF2A1	0.186521	0.00131099	0.0373284
EIF3J	0.256655	0.00132674	0.0375617
C1QB	0.927317	0.00132463	0.0375617
PSAT1	0.524976	0.00134441	0.0377946
DBN1	0.544589	0.00135793	0.0380775
LPAR3	1.02581	0.00136837	0.0380994
SECISBP2	0.263835	0.00138044	0.0383213
LRIF1	0.390927	0.00139118	0.0385505
ATP1A1	0.372603	0.00141867	0.0392422
CREB1	0.225503	0.00142779	0.0394244
TRAPPC1	0.47876	0.00145518	0.0398289
DUSP19	0.510785	0.00147358	0.0402579
LIMA1	0.285536	0.00149871	0.0404276
GBA1	0.349625	0.00150232	0.0404276
CD300H	0.651002	0.00148807	0.0404276
APOL1	0.358423	0.00151997	0.0406417
PAXIP1	0.201448	0.00152705	0.0406463
CDK5RAP2	0.268237	0.00154064	0.0408677
GBP5	0.432657	0.00158316	0.0415684
SLAMF8	0.780038	0.0015801	0.0415684
TAOK1	0.17594	0.0015858	0.0415684
BAZ1A	0.263329	0.00159197	0.0416596
SLC35B3	0.284282	0.00162313	0.0420497
GLS2	0.439879	0.00162173	0.0420497
LBH	0.25735	0.00162091	0.0420497
MTX2	0.293528	0.00163712	0.042271
LYSMD4	0.357473	0.001643	0.0423522
IGLV5-52	0.436577	0.00166454	0.0426948
BTN3A2	0.342473	0.00167459	0.042811
MYL9	0.90184	0.00169719	0.0430452
SELPLG	0.293192	0.00169849	0.0430452
MRM2	0.387649	0.00169679	0.0430452
ZNF318	0.352843	0.00168866	0.0430452
RBM10	0.184167	0.00169452	0.0430452
FECH	0.371038	0.00170906	0.0431238
DTX1	0.643182	0.00172148	0.0433667
LCN2	0.845374	0.00173702	0.0434317
NOLC1	0.259528	0.00173805	0.0434317
CLEC1B	0.659474	0.0017511	0.0436874
ANP32A	0.255539	0.00176217	0.0438227
ZNF175	0.367454	0.00177013	0.0439503
PPP4R3B	0.195076	0.00177841	0.0440456
SUN1	0.213231	0.00179388	0.0442566
MYO16	0.924905	0.00183296	0.0448062
RPSAP16	0.631616	0.00182765	0.0448062
ARL6IP5	0.342349	0.00183672	0.0448149
HNRNPH1	0.223241	0.00187816	0.0456108
NIN	0.188804	0.00188486	0.0456307
EIF2B1	0.220892	0.00188433	0.0456307
CRKL	0.305116	0.00189174	0.0456548
DDX46	0.220302	0.00189964	0.0457741
FYCO1	0.22799	0.00191069	0.0458979
NHEJ1	0.346217	0.0019105	0.0458979
TNFRSF13B	0.579059	0.001915	0.0459304
ARHGAP30	0.228595	0.00194356	0.0465436
PRKCD	0.367322	0.00194702	0.0465546
NIPA1	0.331513	0.00198655	0.0474267
NFIB	0.976361	0.00204143	0.0478533
POLR3GL	0.254418	0.00205954	0.0482051
PMVK	0.355808	0.00210151	0.0489658
DPM2	0.325996	0.00211199	0.0490825
TRPC3	0.991631	0.00213536	0.0493837

## Sheet: Cross-database validation
Cross-Database Validation Upregulated & Downregulated Biological Processes identified by differential gene expression analysis
Common Biological pathway	Biological pathways	FDR	Databases
Pathways upregulated in high malaria exposure group
Regulation of the immune system process	(i)Positive regulation of immune response/Positive regulation of biological process/Positive regulation of cellular process	0.0058	STRING
	(ii)Regulation of immune system process/regulation of immune response	5.41139e-06	WebGestalt
	(iii) Immunomodulation	0.017884	Literature Lab
	(iv)Positive regulation of immune response/Regulation of cell activation	0.0255232	GSEA (C5)
Regulation of B cell activation	(i) Regulation of B cell activation	0.0292	STRING
	(ii) Regulation of B cell activation	9.53433e-05	WebGestalt
	(iii)Memory B Cells	0.0294566	Literature Lab
	(iv) Regulation of cell activation	0.0411686	GSEA (C5)
B cell signalling pathways	(i) Positive regulation of signaling	0.0421	STRING
	(ii) B cell receptor signaling pathway	ns	WebGestalt
	(iii) B Cell Receptor Signaling Pathway	0.0159692	Enrichr
	(iv) B Cell proliferation	0.0328075	msigDB
	(v)B-Cell Signaling/B Lymphocyte Surface	0.0120141	Literature Lab
	(vi)B-Cell mediated immunity/B Cell Receptor Signaling Pathway	0.0255232	GSEA (C5)
mRNA metabolic process	(i)Regulation of mRNA metabolic process/Post-transcriptional regulation of gene expression	0.0315	STRING
	(ii) mRNA metabolic process/mRNA processing	ns	WebGestalt
	(iii) mRNA Processing	ns	Enrichr
	(iv) Regulation of mRNA metabolic process/mRNA processing	0.0308184	msigDB
	(v) RNA Processing, Post-Transcriptional	0.0209843	Literature Lab
Positive regulation of protein localization	(i) Positive regulation of protein localization/Cellular localization	0.0358	STRING
	(ii) positive regulation of protein localization	ns	WebGestalt
	(iii) Regulation of protein localization	0.0328075	msigDB
	Biological pathways	FDR	Databases
Pathways downregulated in high malaria exposure group
Leukocyte chemotaxis	(i) Leukocyte chemotaxis/Leukocyte migration/Chemotaxis/Neutrophil chemotaxis	0.0082	STRING
	(ii) Neutrophil migration/granulocyte migration	4.03651e-05	WebGestalt
	(iii) Granulocyte Chemotaxis/Neutrophil Chemotaxis	0.0261389	Enrichr
	(iv) Neutrophil migration/Granulocyte migration/Myeloid leukocyte migration/Leukocyte chemotaxis/Cell chemotaxis	1.7e-05	msigDB
	(v) Neutrophil Activation/Neutrophil Infiltration	0.00373859	Literature Lab
	(vi) myeloid leukocyte migration	0.0357998	GSEA (C5)
Inflammatory response	(i) Inflammatory response	0.0082	STRING
	(ii) Inflammatory Response/Positive Regulation Of Inflammatory Response/Regulation Of Inflammatory Response	0.0332553	Enrichr
	(ii) Positive regulation of type 1 immune response/Regulation of acute inflammatory response	0.0160754	msigDB
	(iv) Acute Inflammatory Response/Inflammatory Response/Cytokine Inflammatory Response/Inflammasome Signaling	0.00180542	Literature Lab
	(v) Inflammatory response/acute phase response	0.0273937	GSEA (C5)
Blood vessel development	(i) Regulation of vasculature development/ Regulation of angiogenesis/Blood vessel development	0.0082	STRING
	(ii) Blood vessel morphogenesis/blood vessel development/angiogenesis/vasculature development	4.03651e-05	WebGestalt
	(iii) Positive Regulation Of Angiogenesis/Positive Regulation Of Vasculature Development	0.00275181	Enrichr
	(iv) Regulation of vasculature development	0.00867974	msigDB
	(v) Vascular Remodeling	0.00173206	Literature Lab
	(vi) Blood vessel morphogenesis/circulatory system development	0.0482097	GSEA (C5)
Regulation of cell population proliferation	(i) Regulation of cell population proliferation	0.0082	STRING
	(ii) Regulation Of Cell Population Proliferation	0.00110408	Enrichr
